# Supplementary material
Source: publisher figshare collection journal article supplement (https://acs.figshare.com/ndownloader/files/30598804)
Supplement: Supplementary file 1 [file 30598804]

## Sheet: OVERVIEW
Data used for correction of mechanization degree in irrigated agriculture and for computation of machinery size
Sheet	Description
mechanization_correction	Country data and factors for mechanization correction of irrigated area as described in SI1, section 1.1.5 Abbreviations: i, h, l, s: irrigated, high inputs, low inputs, subsistence production f_hls, f_h_hls, f_h: see SI, section 1.1.4 trc_100km2: number of tractors per 100 km2 frt_kg_ha: fertilizer consumption in kg per ha of arable land valadd_wb: value added per worker in agriculture, forestry…
machinery_size	Country data and factors for machinery size calculation as described in SI1, section 1.3.1 size_md: median fieldsize category according to data from Lesiv et al. 2019 3502 - 3506 = XL - XS size_mn: mean fieldsize category according to data from Lesiv et al. 2019 size_md_ip: median fieldsize category according to interpolated data based on Lesiv et al. 2019 (see SI, section 1.3.1) size_mn_ip: mean…

## Sheet: mechanization_correction
id	name	isothreele	wb_a3	i	h	l	s	hls	f_hls	f_h_hls	trc_100km2	trc_year	frt_kg_ha	frt_year	valadd_wb	vawb_year	gni_cpt	gni_year	prank_gni	prank_va	prank_trc	prank_frt	prank_av	f_h
5	Andorra	AND	AND	100	0	0	0	0	0	#NUM!	4584.42	2009									99.3		0.993	#NUM!
37	Dhekelia Sovereign Base Area		CYP	100	0	0	0	0	0	#NUM!	1454.17	2000	196.739	2016	37483.3	2018	28570	2018	81	85.9	92.1	73.7	0.83175	#NUM!
215	Bahrain	BHR	BHR	100	0	0	0	0	0	#NUM!	75	2000	1318.75	2016	10085.5	2018	21890	2018	77.3	61	35.1	98.8	0.6805	#NUM!
105	Palestine	PSE	PSE	100	0	0	0	0	0	#NUM!	737.255	2000			6260.28	2018	3710	2018	35.1	53.7	81.5		0.567667	#NUM!
143	Turkmenistan	TKM	TKM	88	8	4	0	12	0.12	0.666667					4814.48	2010	6740	2018	52.6	45.8			0.492	0.51296
10	Azerbaijan	AZE	AZE	83	2	13	2	17	0.17	0.117647	148.181	2000	14.0928	2016	2328.15	2018	4050	2018	38.4	31.1	51	17.4	0.34475	0.306142
69	Kyrgyzstan	KGZ	KGZ	81	16	2	1	19	0.19	0.842105	188.142	2000	31.4107	2016	1560.61	2018	1220	2018	14.7	22	55.6	26.9	0.298	0.40138
205	Saudi Arabia	SAU	SAU	80	19	0	0	19	0.19	1	26.9233	1998	176.874	2016	24681.2	2018	21600	2018	76.8	80.8	22.5	68.9	0.6225	0.694225
186	Egypt	EGY	EGY	79	0	21	0	21	0.21	0	307.944	2000	649.194	2016	5370.96	2018	2800	2018	28.9	48	68.2	95.8	0.60225	0.475778
150	Uzbekistan	UZB	UZB	71	25	2	2	29	0.29	0.862069			232.703	2016	4025.3	2018	2020	2018	24.6	42.9		79	0.488333	0.596717
211	Suriname	SUR	SUR	66	0	33	0	33	0.33	0	161.053	2000	217.709	2016	40071.4	2018	5210	2018	45	88.1	53.6	77.8	0.66125	0.443037
103	Pakistan	PAK	PAK	65	0	35	0	35	0.35	0	105.217	2000	144.33	2016	1683.81	2018	1590	2018	19.4	24.9	42.4	62.9	0.374	0.2431
194	Guyana	GUY	GUY	63	5	25	7	37	0.37	0.135135			44.604	2016	7701.2	2018	4770	2018	42.7	58.8		30.5	0.44	0.3272
1	Afghanistan	AFG	AFG	59	0	1	40	41	0.41	0	0.143173	2000	12.1823	2016	843.897	2018	550	2018	5.2	11.9	1.3	15	0.0835	0.049265
68	Kuwait	KWT	KWT	57	7	25	10	42	0.42	0.166667	89	2000	750.724	2016	11724.6	2018	34290	2018	84.8	66.7	39.1	97.6	0.7205	0.48789
140	Tajikistan	TJK	TJK	56	35	4	4	43	0.43	0.813953	310.191	2000	81.3774	2016	1563.42	2018	1010	2018	12.8	22.6	68.9	41.9	0.3655	0.558335
107	Peru	PER	PER	52	21	0	27	48	0.48	0.4375	35.2701	1995	127.7	2016	2744.62	2018	6470	2018	51.7	35	24.5	53.9	0.41275	0.42463
75	Libya	LBY	LBY	49	16	1	34	51	0.51	0.313725	218.915	2000	11.6512	2016			6400	2018	51.2		60.3	14.4	0.419667	0.365637
61	Iraq	IRQ	IRQ	47	0	46	7	53	0.53	0	112.385	2000	35.8173	2016	1317.65	2018	5040	2018	44.5	19.2	43.7	27.5	0.33725	0.158507
96	Nepal	NPL	NPL	46	28	7	19	54	0.54	0.518519	111.725	2000	74.0785	2016	599.053	2018	970	2018	12.3	7.9	43	39.5	0.25675	0.398105
170	Japan	JPN	JPN	42	56	2	0	58	0.58	0.965517	4532.13	2000	242.185	2016	23933.8	2017	41310	2018	87.7	79.7	98.7	80.8	0.86725	0.924245
195	Iran	IRN	IRN	42	2	49	7	58	0.58	0.0344828	152.774	2000	76.292	2016	10284.2	2017	5470	2017	46.9	62.7	51.7	40.1	0.5035	0.23147
222	Greece	GRC	GRC	40	60	0	0	60	0.6	1	925.885	2000	123.011	2016	21264.8	2018	19770	2018	74.9	77.4	84.1	51.5	0.71975	0.8879
111	Qatar	QAT	QAT	40	60	0	0	60	0.6	1	63.0769	2000		2016	11509.5	2018	61150	2018	94.3	65	31.8		0.637	0.8548
11	Bangladesh	BGD	BGD	40	12	42	5	59	0.59	0.20339	1.1976	2000	289.402	2016	976.449	2018	1750	2018	21.3	13	4.6	86.8	0.31425	0.248842
224	China	CHN	CHN	37	55	7	2	64	0.64	0.859375	83.7047	2000	503.322	2016	3830.37	2018	9460	2018	60.2	41.8	38.4	94	0.586	0.76096
50	Georgia	GEO	GEO	37	33	23	7	63	0.63	0.52381	216.885	2000	170.832	2016	1647.02	2018	4440	2018	41.7	23.7	59.6	67.1	0.48025	0.507692
168	New Zealand	NZL	NZL	35	54	11	0	65	0.65	0.830769			1777.24	2016	100703	2017	40640	2018	85.8	98.9		100	0.949	0.87215
102	Oman	OMN	OMN	31	5	58	6	69	0.69	0.0724638	58.0645	2000	468.068	2016	13363.6	2018	15140	2018	68.7	70.1	28.5	93.4	0.65175	0.252043
216	India	IND	IND	31	12	34	22	68	0.68	0.176471	129.932	2000	165.848	2016	1712.62	2018	2020	2018	24.6	25.4	48.3	66.5	0.412	0.25184
161	Vietnam	VNM	VNM	29	59	12	1	72	0.72	0.819444	262.494	2000	429.785	2016	1212.03	2018	2360	2018	27	16.4	63.6	92.2	0.498	0.72944
221	Mexico	MEX	MEX	28	48	0	24	72	0.72	0.666667	119.26	2000	114.006	2016	5816	2018	9180	2018	59.2	50.8	46.4	50.3	0.51675	0.62469
252	North Korea	PRK	PRK	27	60	0	12	72	0.72	0.833333													#NUM!	#NUM!
244	Chile	CHL	CHL	27	64	7	2	73	0.73	0.876712	307.257	2000	293.845	2016	12369.6	2018	14670	2018	67.8	67.8	67.5	87.4	0.72625	0.836087
72	Lebanon	LBN	LBN	27	35	7	31	73	0.73	0.479452	640	1999	330.925	2016	6598.91	2018	7920	2018	56.9	55.4	77.5	89.8	0.699	0.53873
42	Eswatini	SWZ	SWZ	27	18	38	17	73	0.73	0.246575	219.831	2000			13836.6	2018	3930	2018	37.4	70.6	60.9		0.563	0.33201
7	Armenia	ARM	ARM	26	18	47	9	74	0.74	0.243243	291.6	2000	110.495	2016			4230	2018	40.3		65.6	47.3	0.510667	0.312773
158	Yemen	YEM	YEM	26	3	59	12	74	0.74	0.0405405	41.0356	2000	16.3965	2016	836.858	2018	1460	2014	18.5	11.3	25.8	19.2	0.187	0.07862
175	Albania	ALB	ALB	25	12	31	31	74	0.74	0.162162	139.913	2000	126.138	2016	5896.5	2018	4860	2018	43.4	52	49.7	53.3	0.496	0.24896
35	Cyprus No Mans Area		CYP	24	18	40	18	76	0.76	0.236842	1454.17	2000	196.739	2016	37483.3	2018	28570	2018	81	85.9	92.1	73.7	0.83175	0.37962
14	Belgium	BEL	BEL	23	77	1	0	78	0.78	0.987179	1116.83	2000	318.485	2016	50061.9	2018	45910	2018	89.1	92.1	87.4	89.2	0.8945	0.96679
246	Portugal	PRT	PRT	23	73	4	0	77	0.77	0.948052	970.193	2000	199.396	2016	16278.7	2018	21990	2018	77.7	72.9	85.4	76	0.78	0.9094
250	Cyprus	CYP	CYP	21	12	60	6	78	0.78	0.153846	1454.17	2000	196.739	2016	37483.3	2018	28570	2018	81	85.9	92.1	73.7	0.83175	0.302985
218	Cuba	CUB	CUB	19	18	34	29	81	0.81	0.222222	216.572	2000	49.4462	2016	3154.85	2018	7480	2016	55.2	38.7	58.6	32.6	0.46275	0.267923
63	Jamaica	JAM	JAM	19	0	81	0	81	0.81	0			57.2463	2016	3910.43	2018	4970	2018	44.1	42.4		35.3	0.406	0.07714
40	Ecuador	ECU	ECU	18	35	10	37	82	0.82	0.426829	90.6683	2000	345.442	2016	4259.46	2018	6110	2018	49.8	44.1	40.4	90.4	0.56175	0.451115
173	Turkey	TUR	TUR	18	18	56	8	82	0.82	0.219512	395.297	2000	137.705	2016	15493.4	2018	10420	2018	62.1	71.8	71.5	58.7	0.66025	0.298845
208	Somaliland		SOM	18	5	32	44	81	0.81	0.0617284	9.58773	2000					130	1990	0.7		14.2		0.0745	0.064155
156	Venezuela	VEN	VEN	17	61	5	17	83	0.83	0.73494			183.468	2016	21767.1	2014	13080	2014	65.4	78		70.7	0.713667	0.731323
138	Syria	SYR	SYR	17	54	24	6	84	0.84	0.642857	215.015	2000	7.55149	2016			1820	2007	22.5		57.6	10.8	0.303	0.58848
87	Mongolia	MNG	MNG	17	51	31	0	82	0.82	0.621951	40.0341	2000	39.9687	2016	4853.08	2018	3660	2018	34.6	46.3	25.2	29.3	0.3385	0.57093
54	Guatemala	GTM	GTM	16	79	4	1	84	0.84	0.940476			303.153	2016	3047.27	2018	4400	2018	41.2	37.9		88	0.557	0.87912
202	Mauritius	MUS	MUS	16	29	55	0	84	0.84	0.345238			235.308	2016	10192.9	2018	12050	2018	64	61.6		79.6	0.684	0.39944
249	Aland	ALA	ALA	15	30	56	0	86	0.86	0.348837													#NUM!	#NUM!
169	Norway	NOR	NOR	15	64	22	0	86	0.86	0.744186	1525.19	2000	203.896	2016	127689	2018	80610	2018	98.6	100	94.7	76.6	0.92475	0.769465
141	East Timor	TLS	TLS	15	68	0	17	85	0.85	0.8	7.08661	1997			1270.34	2017	1820	2018	22.5	18.1	11.9		0.175	0.70625
214	South Korea	KOR	KOR	14	86	0	0	86	0.86	1	1115.43	2000	380.281	2016	19434.3	2018	30600	2018	83.9	75.7	86.8	91.6	0.845	0.9783
243	Denmark	DNK	DNK	14	72	14	0	86	0.86	0.837209	540.206	2000	131.148	2016	51469.8	2018	60140	2018	93.8	93.2	74.8	55.7	0.79375	0.831125
209	Spain	ESP	ESP	13	84	3	0	87	0.87	0.965517	671.418	2000	143.966	2016	49892	2018	29340	2018	82.5	91.5	78.1	61.7	0.7845	0.941985
159	United Arab Emirates	ARE	ARE	13	3	84	0	87	0.87	0.0344828	63.3333	2000	714.927	2015	11243.5	2018	40880	2018	86.3	64.4	32.5	97	0.7005	0.121065
62	Israel	ISR	ISR	12	74	13	1	88	0.88	0.840909	695.266	2000	280.678	2016	91547.2	2018	40920	2018	86.7	97.2	80.1	85	0.8725	0.8447
33	Costa Rica	CRI	CRI	12	47	30	11	88	0.88	0.534091			604.886	2016	10553.1	2018	11520	2018	63.5	63.8		95.2	0.741667	0.559
242	Panama	PAN	PAN	12	30	27	31	88	0.88	0.340909	147.19	2000	49.1229	2016	4225.49	2018	14370	2018	67.3	43.5	50.3	31.7	0.482	0.35784
162	United States of America	USA	USA	11	89	0	0	89	0.89	1	256.81	2000	138.595	2016	79054.8	2017	63080	2018	95.3	95.5	62.9	59.3	0.7825	0.976075
130	South Africa	ZAF	ZAF	11	25	52	12	89	0.89	0.280899	52.3458	2000	58.5116	2016	11816.8	2018	5750	2018	48.8	67.2	27.8	35.9	0.44925	0.299418
245	Italy	ITA	ITA	10	76	14	0	90	0.9	0.844444	1938.45	2000	129.847	2016	44063.7	2018	33730	2018	84.4	89.8	96	55.1	0.81325	0.841325
90	Morocco	MAR	MAR	10	52	26	12	90	0.9	0.577778	49.0202	1999	71.1056	2016	3752.27	2018	3090	2018	30.3	41.2	27.2	38.9	0.344	0.5544
182	Colombia	COL	COL	10	49	15	26	90	0.9	0.544444	82.7097	1997	659.452	2016	6080.51	2018	6180	2018	50.2	52.5	37.7	96.4	0.592	0.5492
200	Malta	MLT	MLT	10	0	90	0	90	0.9	0	1215	2000	264.602	2016	57958.5	2010	26480	2018	79.1	93.8	89.4	84.4	0.86675	0.086675
129	Somalia	SOM	SOM	10	0	16	74	90	0.9	0	9.58773	2000					130	1990	0.7		14.2		0.0745	0.00745
254	France	FRA	FRA	9	91	0	0	91	0.91	1	688.663	2000	163.139	2016	62855.1	2018	41080	2018	87.2	94.4	79.5	65.3	0.816	0.98344
39	Dominican Republic	DOM	DOM	9	37	28	26	91	0.91	0.406593	20.8018	2000	88.0897	2016	10458.5	2018	7760	2018	56.4	63.3	19.9	43.7	0.45825	0.411243
241	Honduras	HND	HND	8	66	0	26	92	0.92	0.717391	48.6891	2000	164.318	2016	2155.36	2018	2350	2018	26.5	30.5	26.5	65.9	0.3735	0.68988
219	Nicaragua	NIC	NIC	8	58	3	31	92	0.92	0.630435	15.4286	1997	61.4632	2016	1978.16	2018	2030	2018	25.6	29.4	17.2	37.7	0.27475	0.60198
136	Sudan	SDN	SDN	8	36	29	26	91	0.91	0.395604			7.17266	2016	4777.43	2018	1560	2018	19	45.2		10.2	0.248	0.38232
92	Northern Cyprus		CYP	8	21	62	9	92	0.92	0.228261	1454.17	2000	196.739	2016	37483.3	2018	28570	2018	81	85.9	92.1	73.7	0.83175	0.27654
238	Netherlands	NLD	NLD	7	89	4	0	93	0.93	0.956989	1631.87	2000	288.924	2016	80778.7	2018	51260	2018	91.9	96	95.4	86.2	0.92375	0.954662
203	Myanmar	MMR	MMR	7	2	68	23	93	0.93	0.0215054	10.7034	2000	17.8732	2016	1712.72	2018	1310	2018	15.2	26	15.2	21	0.1935	0.033545
191	Fiji	FJI	FJI	7	0	93	0	93	0.93	0	357.647	2000	46.0332	2016	2667.02	2018	5860	2018	49.3	34.5	70.9	31.1	0.4645	0.032515
230	Indonesia	IDN	IDN	6	65	2	26	93	0.93	0.698925	1.95756	2000	231.37	2016	3729.61	2018	3840	2018	36.5	40.7	7.3	78.4	0.40725	0.678508
3	Algeria	DZA	DZA	6	2	40	52	94	0.94	0.0212766	124.924	2000	22.3153	2016	20820.7	2018	3920	2017	37	76.3	47.7	24	0.4625	0.04775
80	Macedonia	MKD	MKD	5	86	4	5	95	0.95	0.905263	972.973	2000	79.3149	2016	6284.52	2018	5450	2018	46.4	54.2	86.1	40.7	0.5685	0.888425
112	Romania	ROU	ROU	5	85	1	9	95	0.95	0.894737	170.614	2000	59.9075	2016	6449.25	2018	11290	2018	63	54.8	55	37.1	0.52475	0.876238
41	El Salvador	SLV	SLV	5	77	11	8	96	0.96	0.802083			132.378	2016	2412.68	2018	3820	2018	35.5	31.6		58.1	0.417333	0.786693
212	Thailand	THA	THA	5	68	5	21	94	0.94	0.723404	280.528	2000	161.71	2016	3344.01	2018	6610	2018	52.1	39.5	64.9	64.7	0.553	0.71318
17	Bolivia	BOL	BOL	5	59	17	18	94	0.94	0.62766	19.084	2000	7.60947	2016	2058.44	2018	3370	2018	32.5	29.9	19.2	11.4	0.2325	0.60395
65	Jordan	JOR	JOR	5	57	30	8	95	0.95	0.6	301.684	2000	112.046	2016	16860.5	2018	4200	2018	39.3	73.4	66.9	47.9	0.56875	0.598437
137	Switzerland	CHE	CHE	4	96	0	0	96	0.96	1	2681.02	2000	214.407	2016	28237.1	2018	84410	2018	99.1	83.6	98	77.2	0.89475	0.99579
240	Sweden	SWE	SWE	4	74	22	0	96	0.96	0.770833	610.433	2000	96.3364	2016	97612	2018	55490	2018	92.9	98.3	76.8	45.5	0.78375	0.77135
58	Haiti	HTI	HTI	4	33	4	58	95	0.95	0.347368	1.62222	1998			797.057	2018	800	2018	10.4	10.7	5.3		0.088	0.3344
70	Laos	LAO	LAO	4	26	24	45	95	0.95	0.273684					784.585	2018	2450	2018	27.5	10.2			0.1885	0.269425
197	Kazakhstan	KAZ	KAZ	4	8	87	1	96	0.96	0.0833333	17.2696	2000	4.32557	2016	6950.93	2018	8070	2018	57.3	58.2	17.9	7.2	0.3515	0.09406
153	Western Sahara	ESH	ESH	3	0	97	0	97	0.97	0													#NUM!	#NUM!
9	Austria	AUT	AUT	3	97	0	0	97	0.97	1	2394.77	2000	141.837	2016	35257.7	2018	49310	2018	91	84.2	96.7	60.5	0.831	0.99493
233	Canada	CAN	CAN	3	97	0	0	97	0.97	1	159.136	2000	87.6251	2016	95687.1	2018	44940	2018	88.6	97.7	53	42.5	0.7045	0.991135
227	Germany	DEU	DEU	3	97	1	0	98	0.98	0.989796	838.265	2000	197.228	2016	46326.1	2018	47090	2018	89.6	90.4	82.8	75.4	0.8455	0.98691
225	Sri Lanka	LKA	LKA	3	97	0	0	97	0.97	1			131.923	2016	2788.62	2018	4060	2018	38.9	36.7		57.5	0.443667	0.98331
85	Moldova	MDA	MDA	3	86	8	3	97	0.97	0.886598	229.086	2000	24.4076	2016	2748.96	2018	2980	2018	29.9	35.6	61.6	25.1	0.3805	0.871415
236	Philippines	PHL	PHL	3	73	1	23	97	0.97	0.752577	116.806	2000	157.424	2016	2556.93	2018	3830	2018	36	32.8	45	64.1	0.44475	0.743343
239	Finland	FIN	FIN	3	70	28	0	98	0.98	0.714286	778.945	2000	80.5098	2016	75835.9	2018	48280	2018	90.5	94.9	82.1	41.3	0.772	0.71544
149	Uruguay	URY	URY	3	68	28	1	97	0.97	0.701031	265.586	2000	143.668	2016	24056.4	2018	15650	2018	70.1	80.2	64.2	61.1	0.689	0.70067
171	Tunisia	TUN	TUN	3	49	35	13	97	0.97	0.505155	114.176	2000	59.2513	2016	8667.81	2018	3500	2018	34.1	60.5	44.4	36.5	0.43875	0.503162
229	Argentina	ARG	ARG	3	45	46	7	98	0.98	0.459184	89.5803	2000	50.3363	2016		2018	12390	2018	64.9		39.7	33.5	0.460333	0.459207
26	Cambodia	KHM	KHM	3	14	20	64	98	0.98	0.142857	5.85405	2000	17.3936	2016	1596.75	2018	1390	2018	16.4	23.2	11.3	20.4	0.17825	0.143565
155	Zimbabwe	ZWE	ZWE	3	4	25	68	97	0.97	0.0412371	64.2743	1997	22.9	2016	404.987	2018	1790	2018	21.8	2.8	33.1	24.6	0.20575	0.0461725
127	Slovakia	SVK	SVK	2	94	1	3	98	0.98	0.959184	153.658	2000	125.762	2016	42007	2018	18260	2018	73.5	89.3	52.3	52.7	0.6695	0.95339
160	United Kingdom	GBR	GBR	2	91	7	0	98	0.98	0.928571			252.904	2016	46691.6	2018	41770	2018	88.2	91		82.6	0.872667	0.927453
148	Ukraine	UKR	UKR	2	88	7	3	98	0.98	0.897959	97.9302	2000	52.7474	2016	5099.26	2018	2660	2018	28.4	47.5	41.1	34.7	0.37925	0.887585
247	Russia	RUS	RUS	2	85	8	5	98	0.98	0.867347	60.0608	2000	18.4636	2016	15820.6	2018	10230	2018	61.6	72.3	30.5	21.6	0.465	0.8593
235	Australia	AUS	AUS	2	54	45	0	99	0.99	0.545455			68.1037	2016	82837.9	2018	53230	2018	92.4	96.6		38.3	0.757667	0.547577
106	Paraguay	PRY	PRY	2	34	63	1	98	0.98	0.346939	69.9834	2000	110.35	2016	6892.71	2018	5670	2018	47.6	57.6	34.4	46.7	0.46575	0.349315
23	Bulgaria	BGR	BGR	2	29	36	33	98	0.98	0.295918	98.4373	2000	125.543	2016	10269.9	2018	8860	2018	58.3	62.1	41.7	52.1	0.5355	0.30071
154	Zambia	ZMB	ZMB	2	17	35	45	97	0.97	0.175258			89.5941	2016	476.347	2018	1430	2018	17.5	5.1		44.9	0.225	0.17675
81	Madagascar	MDG	MDG	2	6	30	62	98	0.98	0.0612245	2.66897	2000	5.17497	2016	338.081	2018	510	2018	4.7	1.7	7.9	8.4	0.05675	0.061135
60	Hungary	HUN	HUN	1	98	1	0	99	0.99	0.989899	246.21	2000	128.253	2016	23388.3	2018	14780	2018	68.2	79.1	62.3	54.5	0.66025	0.986603
43	Ethiopia	ETH	ETH	1	26	44	30	100	1	0.26			14.4337	2016	581.031	2018	790	2018	10	7.3		18	0.117667	0.26
228	Brazil	BRA	BRA	1	23	71	4	98	0.98	0.234694	138.026	2000	186.096	2016	13213.7	2018	9140	2018	58.8	68.9	49	71.3	0.62	0.2424
36	Ivory Coast	CIV	CIV	1	21	33	45	99	0.99	0.212121	30	2000	51.6833	2016	2528.82	2018	1600	2018	19.9	32.2	23.8	34.1	0.275	0.21275
82	Malawi	MWI	MWI	1	21	23	55	99	0.99	0.212121			21.6059	2016	470.223	2017	360	2018	1.9	4.5		22.8	0.0973333	0.210973
84	Mali	MLI	MLI	1	20	40	38	98	0.98	0.204082	4.21889	2000	44.235	2016	1217.96	2018	840	2018	10.9	16.9	8.6	29.9	0.16575	0.203315
167	Tanzania	TZA	TZA	1	20	41	38	99	0.99	0.20202	18.9535	2000	12.6045	2016	669.562	2017	1020	2018	13.3	9	18.5	15.6	0.141	0.20141
121	Senegal	SEN	SEN	1	16	37	46	99	0.99	0.161616	1.83323	2000	16.4094	2016	2781.75	2018	1410	2018	17.1	36.2	6.6	19.8	0.19925	0.161993
91	Mozambique	MOZ	MOZ	1	16	22	62	100	1	0.16			3.72271	2016	432.399	2018	460	2018	2.8	4		6.6	0.0446667	0.16
45	Congo, Democratic Republic of the	COD	COD	1	7	24	68	99	0.99	0.0707071			2.4767	2016	317.956	2018	490	2018	3.8	1.1		5.4	0.0343333	0.0703433
6	Angola	AGO	AGO	1	3	18	78	99	0.99	0.030303			7.98274	2016	1511.24	2017	3370	2018	32.5	20.9		12	0.218	0.03218
19	Botswana	BWA	BWA	1	2	21	76	99	0.99	0.020202	76.8	2000	89.5724	2016	1543.8	2018	7750	2018	55.9	21.5	35.8	44.3	0.39375	0.0239375
99	Nigeria	NGA	NGA	1	1	25	73	99	0.99	0.010101	5.54286	2000	5.47037	2016	5588.89	2018	1960	2018	23.7	49.2	9.9	9.6	0.231	0.01231
16	Bhutan	BTN	BTN	1	0	18	81	99	0.99	0	11.0377	2000	13.2533	2016	1407.9	2018	2970	2018	29.4	19.8	16.6	16.2	0.205	0.00205
231	Taiwan	TWN	TWN	0	73	20	8	100	1	0.73													#NUM!	#NUM!
53	Guam	GUM	GUM	0	0	100	0	100	1	0													#NUM!	#NUM!
89	Montserrat	MSR	MSR	0	0	100	0	100	1	0													#NUM!	#NUM!
100	Niue	NIU	NIU	0	0	100	0	100	1	0													#NUM!	#NUM!
157	Wallis and Futuna	WLF	WLF	0	0	100	0	100	1	0													#NUM!	#NUM!
256	French Guiana			0	0	100	0	100	1	0													#NUM!	#NUM!
258	Martinique			0	0	100	0	100	1	0													#NUM!	#NUM!
257	Guadeloupe			0	0	100	0	100	1	0													#NUM!	#NUM!
78	Luxembourg	LUX	LUX	0	100	0	0	100	1	1	1155.65	2000	262.108	2016	26291.3	2018	70870	2018	97.2	82.5	88.7	83.8	0.8805	1
253	Iceland	ISL	ISL	0	100	0	0	100	1	1	699.147	2000	181.529	2016	120233	2016	67960	2018	96.7	99.4	80.8	70.1	0.8675	1
88	Montenegro	MNE	MNE	0	100	0	0	100	1	1			285.208	2016	22090.5	2018	8430	2018	57.8	78.5		85.6	0.739667	1
125	Singapore	SGP	SGP	0	100	0	0	100	1	1				2016	5768.74	2018	58770	2018	93.4	50.3			0.7185	1
189	Estonia	EST	EST	0	100	0	0	100	1	1	600.522	2000	112.681	2016	24999.8	2018	21140	2018	76.3	81.4	76.2	49.1	0.7075	1
18	Bosnia and Herzegovina	BIH	BIH	0	100	0	0	100	1	1	322.222	1996	131.8	2016	6863.56	2018	5740	2018	48.3	56.5	69.5	56.3	0.5765	1
163	Serbia	SRB	SRB	0	100	0	0	100	1	1	21.9658	2008	244.787	2016	6836.34	2018	6390	2018	50.7	55.9	20.5	81.4	0.52125	1
67	Kosovo	-99	XKX	0	100	0	0	100	1	1							4220	2018	39.8				0.398	1
184	Croatia	HRV	HRV	0	99	1	0	100	1	0.99	27.3159	2000	119.31	2016	15128.4	2018	14000	2018	65.9	71.2	23.2	50.9	0.528	0.99
13	Belarus	BLR	BLR	0	98	1	0	99	0.99	0.989899	118.868	2000	146.619	2016	11533	2018	5670	2018	47.6	65.5	45.7	63.5	0.55575	0.985557
199	Malaysia	MYS	MYS	0	95	0	5	100	1	0.95	480.522	1995	1723.39	2016	18008.2	2018	10590	2018	62.6	75.1	72.2	99.4	0.77325	0.95
234	Ireland	IRL	IRL	0	93	7	0	100	1	0.93	1481.2	2000	1247.94	2016	25305.6	2018	61390	2018	94.8	81.9	94	98.2	0.92225	0.93
128	Slovenia	SVN	SVN	0	90	1	8	99	0.99	0.909091	6600.46	2000	258.941	2016	21130.3	2018	24580	2018	78.7	76.8	100	83.2	0.84675	0.908467
164	Czechia	CZE	CZE	0	90	0	9	99	0.99	0.909091	298.23	2000	196.147	2016	26732.8	2018	20240	2018	75.4	83.1	66.2	71.9	0.7415	0.907415
109	Poland	POL	POL	0	83	6	11	100	1	0.83	933.824	2000	172.817	2016	5879.54	2018	14100	2018	66.8	51.4	84.8	68.3	0.67825	0.83
77	Lithuania	LTU	LTU	0	71	25	4	100	1	0.71	354.413	2000	131.865	2016	11627.2	2018	17430	2018	73	66.1	70.2	56.9	0.6655	0.71
71	Latvia	LVA	LVA	0	66	26	8	100	1	0.66	575.412	2000	104.193	2016	17658	2018	16510	2018	72	74.6	75.5	46.1	0.6705	0.66
22	Brunei	BRN	BRN	0	58	3	39	100	1	0.58			141.8	2016	41664	2018	29660	2018	82.9	88.7		59.9	0.771667	0.58
248	Papua New Guinea	PNG	PNG	0	42	1	57	100	1	0.42	58.8832	1997	112.052	2016	1968.49	2017	2570	2018	28	28.8	29.1	48.5	0.336	0.42
57	Guinea Bissau	GNB	GNB	0	36	30	33	99	0.99	0.363636	0.703704	1996			859.53	2018	750	2018	9	12.4	3.3		0.0823333	0.360823
51	Ghana	GHA	GHA	0	29	39	32	100	1	0.29	4.92152	2000	20.8766	2016	2934.46	2018	2130	2018	26.1	37.3	9.3	22.2	0.23725	0.29
27	Cameroon	CMR	CMR	0	28	37	34	99	0.99	0.282828			9.66753	2016	1080.03	2018	1440	2018	18	14.7		12.6	0.151	0.28151
49	Gambia	GMB	GMB	0	26	39	35	100	1	0.26			1.23534	2016	1742.86	2018	710	2018	8.1	26.6		3	0.125667	0.26
24	Burkina Faso	BFA	BFA	0	25	39	36	100	1	0.25	5.71893	1995	21.7735	2016	1826.44	2018	670	2018	7.3	28.2	10.6	23.4	0.17375	0.25
66	Kenya	KEN	KEN	0	21	40	40	100	1	0.21	24.9438	2000	38.1802	2016	1288.86	2018	1620	2018	20.4	18.6	21.2	28.1	0.22075	0.21
25	Burundi	BDI	BDI	0	20	34	46	100	1	0.2			5.42426	2016	184.937	2018	280	2018	1.4	0.6		9	0.0366667	0.2
98	Niger	NER	NER	0	20	40	40	100	1	0.2	0.0929634	1998	0.40209	2016	540.61	2018	390	2018	2.4	6.2	0.7	1.2	0.02625	0.2
48	Gabon	GAB	GAB	0	15	24	62	100	1	0.15			26.7664	2016	4865.72	2018	6830	2018	53.1	46.9		26.3	0.421	0.15
15	Benin	BEN	BEN	0	15	35	50	100	1	0.15	0.808889	1998	14.7476	2016	1142.45	2018	870	2018	11.8	15.3	4	18.6	0.12425	0.15
113	Rwanda	RWA	RWA	0	15	28	58	100	1	0.15	0.666667	2000	10.8575	2016	602.047	2018	780	2018	9.5	8.5	2.6	13.2	0.0845	0.15
46	Congo	COG	COG	0	14	40	46	100	1	0.14			1.84409	2016	1001.86	2018	1640	2018	20.9	13.6		4.2	0.129	0.14
29	Central African Republic	CAF	CAF	0	13	33	55	100	1	0.13			0.340972	2015	408.67	2018	490	2018	3.8	3.4		0.6	0.026	0.13
188	Eritrea	ERI	ERI	0	12	46	42	100	1	0.12	8.26786	2000	2.78603	2016			720	2011	8.5		13.2	6	0.0923333	0.12
124	Sierra Leone	SLE	SLE	0	11	24	65	100	1	0.11	1.67355	1997			1240.99	2018	490	2018	3.8	17.5	6		0.091	0.11
30	Chad	TCD	TCD	0	10	38	52	100	1	0.1					1420	2018	670	2018	7.3	20.3			0.138	0.1
179	Belize	BLZ	BLZ	0	9	91	0	100	1	0.09			466.249	2016	4489.5	2018	4470	2018	42.2	44.6		92.8	0.598667	0.09
110	Puerto Rico	PRI	PRI	0	8	92	0	100	1	0.08	501.173	2000			50660.9	2010	21100	2018	75.8	92.7	73.5		0.806667	0.08
142	Togo	TGO	TGO	0	8	30	62	100	1	0.08	0.32	2000	11.0261	2016	1160.44	2018	660	2018	6.6	15.8	2	13.8	0.0955	0.08
223	Grenada	GRD	GRD	0	7	93	0	100	1	0.07	120	1999					9650	2018	61.1		47		0.5405	0.07
187	Equatorial Guinea	GNQ	GNQ	0	7	27	66	100	1	0.07					1679.67	2018	6840	2018	53.6	24.3			0.3895	0.07
56	Guinea	GIN	GIN	0	7	46	47	100	1	0.07	25.0721	2000	1.56858	2016	717.297	2018	850	2018	11.4	9.6	21.9	3.6	0.11625	0.07
74	Liberia	LBR	LBR	0	7	47	46	100	1	0.07					1022.66	2018	610	2018	5.7	14.1			0.099	0.07
73	Lesotho	LSO	LSO	0	6	20	73	99	0.99	0.0606061	62.5	1995			384.406	2018	1390	2018	16.4	2.3	31.1		0.166	0.06166
115	South Sudan	SSD	SSD	0	4	95	1	100	1	0.04					484.38	2015	1130	2015	13.7	5.6			0.0965	0.04
151	Vanuatu	VUT	VUT	0	1	99	0	100	1	0.01					2598.31	2014	3130	2018	30.8	33.9			0.3235	0.01
201	Mauritania	MRT	MRT	0	0	19	80	99	0.99	0	7.78689	2000			1814.02	2018	1160	2018	14.2	27.7	12.6		0.181667	0.00181667
28	Cayman Islands	CYM	CYM	0	0	100	0	100	1	0							47140	2017	90				0.9	0
180	Bermuda	BMU	BMU	0	0	100	0	100	1	0	1125	1998	177.1	2016			106140	2013	99.5		88.1	69.5	0.857	0
204	New Caledonia	NCL	NCL	0	0	100	0	100	1	0	2664.29	2000	238.141	2016			14020	2000	66.4		97.4	80.2	0.813333	0
192	French Polynesia	PYF	PYF	0	0	100	0	100	1	0	910	1995	252.032	2016			15760	2000	70.6		83.4	82	0.786667	0
213	Trinidad and Tobago	TTO	TTO	0	0	100	0	100	1	0	1414.29	2000	356	2016	6123.69	2018	15950	2018	71.6	53.1	90.1	91	0.7645	0
237	The Bahamas	BHS	BHS	0	0	100	0	100	1	0	163.333	1996	144.017	2016	17513.7	2018	30520	2018	83.4	74	54.3	62.3	0.685	0
117	Saint Lucia	LCA	LCA	0	0	100	0	100	1	0	675	2000	170.893	2016	5550.57	2018	9560	2018	60.7	48.6	78.8	67.7	0.6395	0
12	Barbados	BRB	BRB	0	0	100	0	100	1	0			113.804	2016	13240.8	2016	15410	2018	69.2	69.5		49.7	0.628	0
210	Saint Vincent and the Grenadines	VCT	VCT	0	0	100	0	100	1	0	208	2000			7939.01	2018	7340	2018	54.5	59.9	57		0.571333	0
38	Dominica	DMA	DMA	0	0	100	0	100	1	0			88.0517	2016			7090	2018	54			43.1	0.4855	0
134	Saint Kitts and Nevis	KNA	KNA	0	0	100	0	100	1	0	207.143	2000	0.46	2016			18340	2018	73.9		56.3	1.8	0.44	0
177	Antigua and Barbuda	ATG	ATG	0	0	100	0	100	1	0			13.87	2016			15890	2018	71.1			16.8	0.4395	0
94	Namibia	NAM	NAM	0	0	19	81	100	1	0			26.1067	2016	6867.02	2018	5220	2018	45.5	57.1		25.7	0.427667	0
226	Tonga	TON	TON	0	0	100	0	100	1	0	80	2000	39.3006	2016	5631.62	2016	4300	2018	40.8	49.7	36.8	28.7	0.39	0
185	Djibouti	DJI	DJI	0	0	0	100	100	1	0	80	2000					3190	2018	31.8		36.8		0.343	0
165	Micronesia, Federated States of	FSM	FSM	0	0	100	0	100	1	0							3400	2018	33.2				0.332	0
198	Kiribati	KIR	KIR	0	0	100	0	100	1	0							3140	2018	31.3				0.313	0
181	Cape Verde	CPV	CPV	0	0	100	0	100	1	0	10.9091	2000			3513.76	2018	3420	2018	33.6	40.1	15.9		0.298667	0
139	Sao Tome and Principe	STP	STP	0	0	88	12	100	1	0					1807.62	2018	1890	2018	23.2	27.1			0.2515	0
207	Solomon Islands	SLB	SLB	0	0	100	0	100	1	0							2020	2018	24.6				0.246	0
147	Uganda	UGA	UGA	0	0	99	1	100	1	0			1.91085	2016	569.79	2018	620	2018	6.2	6.8		4.8	0.0593333	0
176	Anguilla	AIA	AIA																				#NUM!
217	Antarctica	ATA	ATA																				#NUM!
193	French Southern and Antarctic Lands	ATF	ATF																				#NUM!
132	Saint Barthelemy	BLM	BLM																				#NUM!
174	Cook Islands	COK	COK																				#NUM!
190	Falkland Islands	FLK	FLK																				#NUM!
44	Faroe Islands	FRO	FRO																				#NUM!
52	Gibraltar	GIB	GIB																				#NUM!
59	Heard Island and McDonald Islands	HMD	HMD																				#NUM!
20	British Indian Ocean Territory	IOT	IOT																				#NUM!
133	Saint Martin	MAF	MAF																				#NUM!
86	Monaco	MCO	MCO																				#NUM!
101	Norfolk Island	NFK	NFK																				#NUM!
108	Pitcairn Islands	PCN	PCN																				#NUM!
114	South Georgia and South Sandwich Islands	SGS	SGS																				#NUM!
116	Saint Helena	SHN	SHN																				#NUM!
119	San Marino	SMR	SMR																				#NUM!
135	Saint Pierre and Miquelon	SPM	SPM																				#NUM!
126	Sint Maarten	SXM	SXM																				#NUM!
145	United States Minor Outlying Islands	UMI	UMI																				#NUM!
152	Vatican	VAT	VAT																				#NUM!
21	British Virgin Islands	VGB	VGB																				#NUM!
259	Mayotte																						#NUM!
260	RÃ©union																						#NUM!
471	Bouvet Island																						#NUM!
123	Siachen Glacier																						#NUM!
178	Bajo Nuevo Bank (Petrel Is.)																						#NUM!
97	Australia, Indian Ocean Territories																						#NUM!
470	Svalbard and Jan Mayen																						#NUM!
131	Spratly Islands																						#NUM!
122	Serranilla Bank																						#NUM!
255	Bonaire, Saint Eustatius and Saba																						#NUM!
183	Coral Sea Islands																						#NUM!
31	Clipperton Island																						#NUM!
120	Scarborough Reef																						#NUM!
472	Tokelau																						#NUM!
47	Australia, Ashmore and Cartier Islands																						#NUM!
76	Liechtenstein	LIE	LIE														116430	2009	100				1
79	Macao S.A.R	MAC	MAC														79110	2018	98.1				0.981
196	Isle of Man	IMN	IMN														75340	2017	97.6				0.976
55	Guernsey	GGY	CHI														66230	2007	96				0.96
64	Jersey	JEY	CHI														66230	2007	96				0.96
232	Greenland	GRL	GRL														34800	2007	85.3				0.853
2	Akrotiri Sovereign Base Area		CYP								1454.17	2000	196.739	2016	37483.3	2018	28570	2018	81	85.9	92.1	73.7	0.83175
206	Seychelles	SYC	SYC										521.733	2016			15600	2018	69.7			94.6	0.8215
251	Hong Kong S.A.R.	HKG	HKG											2016	12638.6	2018	50300	2018	91.5	68.4			0.7995
144	Turks and Caicos Islands	TCA	TCA														26740	2018	79.6				0.796
8	Aruba	ABW	ABW														23630	2017	78.2				0.782
34	CuraÃ§ao	CUW	CUW														19070	2017	74.4				0.744
93	Northern Mariana Islands	MNP	MNP								510	2000									74.2		0.742
166	United States Virgin Islands	VIR	VIR								490	2000									72.8		0.728
104	Palau	PLW	PLW														17280	2018	72.5				0.725
83	Maldives	MDV	MDV										314.9	2016	7828.61	2018	9280	2018	59.7	59.3		88.6	0.692
95	Nauru	NRU	NRU														12060	2018	64.5				0.645
146	US Naval Base Guantanamo Bay		CUB								216.572	2000	49.4462	2016	3154.85	2018	7480	2016	55.2	38.7	58.6	32.6	0.46275
172	Tuvalu	TUV	TUV														5430	2018	46				0.46
118	Samoa	WSM	WSM								60	2000	4.6375	2016	39189.1	2018	4020	2018	37.9	87.6	29.8	7.8	0.40775
4	American Samoa	ASM	ASM								68	2000									33.8		0.338
32	Comoros	COM	COM												2569.54	2018	1380	2018	15.6	33.3			0.2445
220	Marshall Islands	MHL	MHL										0.5	2005			4860	2018	43.4			2.4	0.229

## Sheet: machinery_size
id	name	isothreele	wb_a3	Small states	Island	Region	IncomeGroup	size_md	size_mn	size_md_ip	size_mn_ip	income_manual	fieldsize_manual	comment	1	2	3	4	5	6	7	size_category
235	Australia	AUS	AUS			East Asia & Pacific	High income	3503	3503.09	3503	3503.13	High income	3503		1							1
233	Canada	CAN	CAN			North America	High income	3503	3503.22	3503	3503.41	High income	3503		1							1
102	Oman	OMN	OMN			Middle East & North Africa	High income	3503	3503.02	3503	3503.12	High income	3503		1							1
111	Qatar	QAT	QAT	Small states		Middle East & North Africa	High income	3503	3502.99	3503	3502.94	High income	3503		1							1
205	Saudi Arabia	SAU	SAU			Middle East & North Africa	High income	3503	3503.72	3503	3503.8	High income	3503		1							1
162	United States of America	USA	USA			North America	High income	3503	3503.52	3503.87	3503.68	High income	3503		1							1
149	Uruguay	URY	URY			Latin America & Caribbean	High income	3503	3503.25	3503	3503.3	High income	3503		1							1
237	The Bahamas	BHS	BHS	Small states	Island	Latin America & Caribbean	High income	3503	3503	3503.53	3504.2	High income	3504	small island		2						2
215	Bahrain	BHR	BHR	Small states	Island	Middle East & North Africa	High income	3503	3502.92	3503	3503	High income	3504	small island		2						2
127	Slovakia	SVK	SVK			Europe & Central Asia	High income	3503	3503.65	3504	3503.69	High income	3504	other field size values		2						2
14	Belgium	BEL	BEL			Europe & Central Asia	High income	3504	3504.5	3505	3504.51	High income	3504			2						2
244	Chile	CHL	CHL			Latin America & Caribbean	High income	3504	3504.15	3504	3504.13	High income	3504			2						2
164	Czechia	CZE	CZE			Europe & Central Asia	High income	3504	3503.69	3504	3503.69	High income	3504			2						2
243	Denmark	DNK	DNK			Europe & Central Asia	High income	3504	3503.87	3504	3503.87	High income	3504			2						2
189	Estonia	EST	EST	Small states		Europe & Central Asia	High income	3504	3503.76	3504	3503.77	High income	3504			2						2
239	Finland	FIN	FIN			Europe & Central Asia	High income	3504	3504.44	3504	3504.51	High income	3504			2						2
254	France	FRA	FRA			Europe & Central Asia	High income	3504	3504.39	3504	3504.47	High income	3504			2						2
227	Germany	DEU	DEU			Europe & Central Asia	High income	3504	3504.11	3504	3504.11	High income	3504			2						2
60	Hungary	HUN	HUN			Europe & Central Asia	High income	3504	3503.9	3504	3503.85	High income	3504			2						2
196	Isle of Man	IMN	IMN		Island	Europe & Central Asia	High income	3504	3504			High income	3504			2						2
71	Latvia	LVA	LVA			Europe & Central Asia	High income	3504	3504.04	3504	3504.08	High income	3504			2						2
77	Lithuania	LTU	LTU			Europe & Central Asia	High income	3504	3503.92	3504	3503.94	High income	3504			2						2
78	Luxembourg	LUX	LUX			Europe & Central Asia	High income	3504	3504.13	3504	3504.19	High income	3504			2						2
238	Netherlands	NLD	NLD			Europe & Central Asia	High income	3504	3504.34	3504	3504.34	High income	3504			2						2
168	New Zealand	NZL	NZL			East Asia & Pacific	High income	3504	3504.06	3504	3504.04	High income	3504			2						2
169	Norway	NOR	NOR			Europe & Central Asia	High income	3504	3504.53	3505	3504.92	High income	3504			2						2
242	Panama	PAN	PAN			Latin America & Caribbean	High income	3504	3504.41	3504	3504.47	High income	3504			2						2
240	Sweden	SWE	SWE			Europe & Central Asia	High income	3504	3504.36	3504.86	3504.52	High income	3504			2						2
213	Trinidad and Tobago	TTO	TTO	Small states	Island	Latin America & Caribbean	High income	3504	3504	3504	3504	High income	3504			2						2
160	United Kingdom	GBR	GBR			Europe & Central Asia	High income	3504	3504.2	3504	3504.13	High income	3504			2						2
12	Barbados	BRB	BRB	Small states	Island	Latin America & Caribbean	High income			3504	3504	High income	3504	size interpolated		2						2
22	Brunei	BRN	BRN	Small states		East Asia & Pacific	High income			3503.96	3503.97	High income	3504	size interpolated		2						2
28	Cayman Islands	CYM	CYM		Island	Latin America & Caribbean	High income			3504	3504	High income	3504	size interpolated		2						2
204	New Caledonia	NCL	NCL		Island	East Asia & Pacific	High income			3504.39	3504.34	High income	3504	size interpolated		2						2
125	Singapore	SGP	SGP			East Asia & Pacific	High income			3503	3503	High income	3504	island		2						2
9	Austria	AUT	AUT			Europe & Central Asia	High income	3505	3504.71	3505	3504.74	High income	3505			2						2
55	Guernsey	GGY	CHI		Island	Europe & Central Asia	High income	3505	3504.76			High income	3505			2						2
64	Jersey	JEY	CHI		Island	Europe & Central Asia	High income	3505	3505			High income	3505			2						2
52	Gibraltar	GIB	GIB			Europe & Central Asia	High income	3505	3505			High income	3505			2						2
253	Iceland	ISL	ISL	Small states	Island	Europe & Central Asia	High income	3505	3504.51	3504	3504.36	High income	3505			2						2
234	Ireland	IRL	IRL			Europe & Central Asia	High income	3505	3504.57	3505	3504.58	High income	3505			2						2
62	Israel	ISR	ISR			Middle East & North Africa	High income	3505	3504.54	3505	3504.68	High income	3505			2						2
245	Italy	ITA	ITA			Europe & Central Asia	High income	3505	3505.09	3505	3505.16	High income	3505			2						2
68	Kuwait	KWT	KWT			Middle East & North Africa	High income	3505	3505	3505	3505.03	High income	3505			2						2
76	Liechtenstein	LIE	LIE			Europe & Central Asia	High income	3505	3505			High income	3505			2						2
200	Malta	MLT	MLT	Small states	Island	Middle East & North Africa	High income	3505	3505	3505	3505	High income	3505			2						2
109	Poland	POL	POL			Europe & Central Asia	High income	3505	3504.63	3505	3504.61	High income	3505			2						2
119	San Marino	SMR	SMR	Small states		Europe & Central Asia	High income	3505	3505			High income	3505			2						2
209	Spain	ESP	ESP			Europe & Central Asia	High income	3505	3504.77	3505	3504.8	High income	3505			2						2
137	Switzerland	CHE	CHE			Europe & Central Asia	High income	3505	3504.75	3505	3504.72	High income	3505			2						2
249	Aland	ALA	ALA		Island			3505	3505	3505	3505	High income	3505	as Finland		2						2
180	Bermuda	BMU	BMU			North America	High income			3505	3505	High income	3505	size interpolated		2						2
192	French Polynesia	PYF	PYF		Island	East Asia & Pacific	High income			3505.25	3505.36	High income	3505	size interpolated		2						2
5	Andorra	AND	AND			Europe & Central Asia	High income	3506	3506	3506	3506	High income	3506			2						2
184	Croatia	HRV	HRV			Europe & Central Asia	High income	3506	3505.42	3506	3505.51	High income	3506			2						2
2	Akrotiri Sovereign Base Area		CYP	Small states	Island	Europe & Central Asia	High income	3506	3506			High income	3506			2						2
250	Cyprus	CYP	CYP	Small states	Island	Europe & Central Asia	High income	3506	3506	3506	3506	High income	3506			2						2
35	Cyprus No Mans Area		CYP	Small states	Island	Europe & Central Asia	High income	3506	3505.98	3506	3506	High income	3506			2						2
37	Dhekelia Sovereign Base Area		CYP	Small states	Island	Europe & Central Asia	High income	3506	3506	3506	3506	High income	3506			2						2
92	Northern Cyprus		CYP	Small states	Island	Europe & Central Asia	High income	3506	3506	3506	3506	High income	3506			2						2
222	Greece	GRC	GRC			Europe & Central Asia	High income	3506	3505.57	3506	3505.66	High income	3506			2						2
251	Hong Kong S.A.R.	HKG	HKG			East Asia & Pacific	High income	3506	3506			High income	3506			2						2
170	Japan	JPN	JPN			East Asia & Pacific	High income	3506	3505.6	3506	3505.67	High income	3506			2						2
214	South Korea	KOR	KOR			East Asia & Pacific	High income	3506	3505.91	3506	3505.94	High income	3506			2						2
79	Macao S.A.R	MAC	MAC			East Asia & Pacific	High income	3506	3506			High income	3506			2						2
93	Northern Mariana Islands	MNP	MNP		Island	East Asia & Pacific	High income	3506	3506			High income	3506			2						2
246	Portugal	PRT	PRT			Europe & Central Asia	High income	3506	3505.21	3506	3505.25	High income	3506			2						2
110	Puerto Rico	PRI	PRI			Latin America & Caribbean	High income	3506	3505.98	3506	3506	High income	3506			2						2
128	Slovenia	SVN	SVN			Europe & Central Asia	High income	3506	3505.57	3506	3505.56	High income	3506			2						2
159	United Arab Emirates	ARE	ARE			Middle East & North Africa	High income	3506	3504.55	3506	3504.77	High income	3506			2						2
197	Kazakhstan	KAZ	KAZ			Europe & Central Asia	Upper middle income	3502	3502.44	3502.41	3502.68	Upper middle income	3502				3					3
229	Argentina	ARG	ARG			Latin America & Caribbean	Upper middle income	3503	3503.17	3503	3503.39	Upper middle income	3503				3					3
13	Belarus	BLR	BLR			Europe & Central Asia	Upper middle income	3503	3503.34	3503	3503.39	Upper middle income	3503				3					3
106	Paraguay	PRY	PRY			Latin America & Caribbean	Upper middle income	3503	3503.58	3503	3503.46	Upper middle income	3503				3					3
247	Russia	RUS	RUS			Europe & Central Asia	Upper middle income	3503	3502.92	3503	3503.07	Upper middle income	3503				3					3
130	South Africa	ZAF	ZAF			Sub-Saharan Africa	Upper middle income	3503	3503.79	3503.87	3503.89	Upper middle income	3503				3					3
3	Algeria	DZA	DZA			Middle East & North Africa	Upper middle income	3504	3504.56	3505	3504.79	Upper middle income	3504					4				4
10	Azerbaijan	AZE	AZE			Europe & Central Asia	Upper middle income	3504	3504.56	3504	3504.61	Upper middle income	3504					4				4
179	Belize	BLZ	BLZ	Small states		Latin America & Caribbean	Upper middle income	3504	3504.29	3504	3504.06	Upper middle income	3504					4				4
19	Botswana	BWA	BWA	Small states		Sub-Saharan Africa	Upper middle income	3504	3504.09	3504	3504.35	Upper middle income	3504					4				4
228	Brazil	BRA	BRA			Latin America & Caribbean	Upper middle income	3504	3503.66	3503.88	3503.71	Upper middle income	3504	adjusted for states				4				4
23	Bulgaria	BGR	BGR			Europe & Central Asia	Upper middle income	3504	3503.95	3504	3504.18	Upper middle income	3504					4				4
182	Colombia	COL	COL			Latin America & Caribbean	Upper middle income	3504	3504.51	3504.59	3504.76	Upper middle income	3504					4				4
194	Guyana	GUY	GUY	Small states		Latin America & Caribbean	Upper middle income	3504	3504.47	3504	3503.91	Upper middle income	3504					4				4
61	Iraq	IRQ	IRQ			Middle East & North Africa	Upper middle income	3504	3504.39	3504.73	3504.63	Upper middle income	3504					4				4
221	Mexico	MEX	MEX			Latin America & Caribbean	Upper middle income	3504	3504.52	3504	3504.5	Upper middle income	3504					4				4
143	Turkmenistan	TKM	TKM			Europe & Central Asia	Upper middle income	3504	3504.14	3504	3504.16	Upper middle income	3504					4				4
156	Venezuela	VEN	VEN			Latin America & Caribbean	Upper middle income	3504	3503.96	3504	3504.34	Upper middle income	3504					4				4
191	Fiji	FJI	FJI	Small states	Island	East Asia & Pacific	Upper middle income			3503.52	3503.52	Upper middle income	3504	size interpolated				4				4
223	Grenada	GRD	GRD	Small states	Island	Latin America & Caribbean	Upper middle income			3504	3504	Upper middle income	3504	size interpolated				4				4
117	Saint Lucia	LCA	LCA	Small states	Island	Latin America & Caribbean	Upper middle income			3504	3504	Upper middle income	3504	size interpolated				4				4
7	Armenia	ARM	ARM			Europe & Central Asia	Upper middle income	3505	3505.04	3505	3504.79	Upper middle income	3505					4				4
33	Costa Rica	CRI	CRI			Latin America & Caribbean	Upper middle income	3505	3504.93	3505	3505.15	Upper middle income	3505					4				4
218	Cuba	CUB	CUB			Latin America & Caribbean	Upper middle income	3505	3504.79	3505	3504.75	Upper middle income	3505					4				4
146	US Naval Base Guantanamo Bay		CUB		Island	Latin America & Caribbean	Upper middle income	3505	3504.59			Upper middle income	3505					4				4
39	Dominican Republic	DOM	DOM			Latin America & Caribbean	Upper middle income	3505	3504.84	3505	3504.94	Upper middle income	3505					4				4
195	Iran	IRN	IRN			Middle East & North Africa	Upper middle income	3505	3505.12	3505.75	3505.28	Upper middle income	3505					4				4
65	Jordan	JOR	JOR			Middle East & North Africa	Upper middle income	3505	3505.25	3505	3504.95	Upper middle income	3505					4				4
75	Libya	LBY	LBY			Middle East & North Africa	Upper middle income	3505	3504.48	3504.63	3504.4	Upper middle income	3505					4				4
199	Malaysia	MYS	MYS			East Asia & Pacific	Upper middle income	3505	3504.68	3505	3504.66	Upper middle income	3505					4				4
112	Romania	ROU	ROU			Europe & Central Asia	Upper middle income	3505	3504.56	3505	3504.72	Upper middle income	3505					4				4
211	Suriname	SUR	SUR	Small states		Latin America & Caribbean	Upper middle income	3505	3505.15	3506	3505.48	Upper middle income	3505					4				4
173	Turkey	TUR	TUR			Europe & Central Asia	Upper middle income	3505	3505.09	3505.13	3505.25	Upper middle income	3505					4				4
175	Albania	ALB	ALB			Europe & Central Asia	Upper middle income	3506	3505.98	3506	3505.98	Upper middle income	3506					4				4
18	Bosnia and Herzegovina	BIH	BIH			Europe & Central Asia	Upper middle income	3506	3505.68	3506	3505.71	Upper middle income	3506					4				4
224	China	CHN	CHN			East Asia & Pacific	Upper middle income	3506	3505.67	3506	3505.65	Upper middle income	3506					4				4
40	Ecuador	ECU	ECU			Latin America & Caribbean	Upper middle income	3506	3505.29	3505.12	3505.2	Upper middle income	3506					4				4
50	Georgia	GEO	GEO			Europe & Central Asia	Upper middle income	3506	3505.16	3505.75	3505.16	Upper middle income	3506					4				4
54	Guatemala	GTM	GTM			Latin America & Caribbean	Upper middle income	3506	3505.16	3506	3505.25	Upper middle income	3506					4				4
63	Jamaica	JAM	JAM	Small states	Island	Latin America & Caribbean	Upper middle income	3506	3506	3506	3506	Upper middle income	3506					4				4
67	Kosovo	-99	XKX			Europe & Central Asia	Upper middle income	3506	3505.87	3506	3505.84	Upper middle income	3506					4				4
72	Lebanon	LBN	LBN			Middle East & North Africa	Upper middle income	3506	3505.93	3506	3505.9	Upper middle income	3506					4				4
220	Marshall Islands	MHL	MHL	Small states	Island	East Asia & Pacific	Upper middle income	3506	3506			Upper middle income	3506					4				4
88	Montenegro	MNE	MNE	Small states		Europe & Central Asia	Upper middle income	3506	3505.8	3505.85	3505.59	Upper middle income	3506					4				4
80	Macedonia	MKD	MKD			Europe & Central Asia	Upper middle income	3506	3505.75	3506	3505.79	Upper middle income	3506					4				4
107	Peru	PER	PER			Latin America & Caribbean	Upper middle income	3506	3505.79	3506	3505.63	Upper middle income	3506					4				4
163	Serbia	SRB	SRB			Europe & Central Asia	Upper middle income	3506	3505.31	3506	3505.39	Upper middle income	3506					4				4
225	Sri Lanka	LKA	LKA			South Asia	Upper middle income	3506	3505.93	3506	3505.91	Upper middle income	3506					4				4
212	Thailand	THA	THA			East Asia & Pacific	Upper middle income	3506	3505.59	3506	3505.6	Upper middle income	3506					4				4
231	Taiwan	TWN	TWN		Island			3506	3506	3506	3506	Upper middle income	3506	as China				4				4
187	Equatorial Guinea	GNQ	GNQ	Small states		Sub-Saharan Africa	Upper middle income			3505.58	3504.85	Upper middle income	3506	size interpolated				4				4
48	Gabon	GAB	GAB	Small states		Sub-Saharan Africa	Upper middle income			3506	3505.7	Upper middle income	3506	size interpolated				4				4
202	Mauritius	MUS	MUS	Small states	Island	Sub-Saharan Africa	Upper middle income			3506	3506	Upper middle income	3506	size interpolated				4				4
85	Moldova	MDA	MDA			Europe & Central Asia	Lower middle income	3503	3503.8	3503	3503.79	Lower middle income	3503						5			5
87	Mongolia	MNG	MNG			East Asia & Pacific	Lower middle income	3503	3502.51	3503	3502.94	Lower middle income	3503						5			5
148	Ukraine	UKR	UKR			Europe & Central Asia	Lower middle income	3503	3503.42	3503	3503.49	Lower middle income	3503						5			5
151	Vanuatu	VUT	VUT	Small states	Island	East Asia & Pacific	Lower middle income	3503	3504.13	3504.61	3504.5	Lower middle income	3503						5			5
17	Bolivia	BOL	BOL			Latin America & Caribbean	Lower middle income	3504	3504.25	3505	3504.64	Lower middle income	3504						5			5
69	Kyrgyzstan	KGZ	KGZ			Europe & Central Asia	Lower middle income	3504	3504.63	3505	3504.92	Lower middle income	3504						5			5
136	Sudan	SDN	SDN			Sub-Saharan Africa	Lower middle income	3504	3504.25	3505	3504.62	Lower middle income	3504						5			5
150	Uzbekistan	UZB	UZB			Europe & Central Asia	Lower middle income	3504	3504.28	3504	3504.38	Lower middle income	3504						5			5
42	Eswatini	SWZ	SWZ	Small states		Sub-Saharan Africa	Lower middle income	3505	3505.16	3505	3505.09	Lower middle income	3505							6		6
90	Morocco	MAR	MAR			Middle East & North Africa	Lower middle income	3505	3505.12	3505.02	3505.31	Lower middle income	3505							6		6
219	Nicaragua	NIC	NIC			Latin America & Caribbean	Lower middle income	3505	3505.15	3505	3504.93	Lower middle income	3505							6		6
121	Senegal	SEN	SEN			Sub-Saharan Africa	Lower middle income	3505	3505.03	3505	3505.13	Lower middle income	3505							6		6
171	Tunisia	TUN	TUN			Middle East & North Africa	Lower middle income	3505	3505.01	3505	3504.98	Lower middle income	3505							6		6
105	Palestine	PSE	PSE			Middle East & North Africa	Lower middle income	3505	3504.81	3505	3505	Lower middle income	3505							6		6
153	Western Sahara	ESH	ESH							3505	3505.36	Lower middle income	3505	as Morocco						6		6
6	Angola	AGO	AGO			Sub-Saharan Africa	Lower middle income	3506	3505.62	3506	3505.42	Lower middle income	3506							6		6
11	Bangladesh	BGD	BGD			South Asia	Lower middle income	3506	3505.99	3506	3505.98	Lower middle income	3506							6		6
16	Bhutan	BTN	BTN	Small states		South Asia	Lower middle income	3506	3506	3506	3506	Lower middle income	3506							6		6
26	Cambodia	KHM	KHM			East Asia & Pacific	Lower middle income	3506	3505.55	3506	3505.54	Lower middle income	3506							6		6
27	Cameroon	CMR	CMR			Sub-Saharan Africa	Lower middle income	3506	3505.87	3506	3505.68	Lower middle income	3506							6		6
46	Congo	COG	COG			Sub-Saharan Africa	Lower middle income	3506	3505.97	3506	3505.71	Lower middle income	3506							6		6
36	Ivory Coast	CIV	CIV			Sub-Saharan Africa	Lower middle income	3506	3505.7	3506	3505.73	Lower middle income	3506							6		6
186	Egypt	EGY	EGY			Middle East & North Africa	Lower middle income	3506	3505.69	3506	3505.33	Lower middle income	3506							6		6
41	El Salvador	SLV	SLV			Latin America & Caribbean	Lower middle income	3506	3505.72	3506	3505.7	Lower middle income	3506							6		6
51	Ghana	GHA	GHA			Sub-Saharan Africa	Lower middle income	3506	3505.61	3506	3505.7	Lower middle income	3506							6		6
241	Honduras	HND	HND			Latin America & Caribbean	Lower middle income	3506	3505.47	3505.31	3505.35	Lower middle income	3506							6		6
216	India	IND	IND			South Asia	Lower middle income	3506	3505.78	3506	3505.8	Lower middle income	3506							6		6
230	Indonesia	IDN	IDN			East Asia & Pacific	Lower middle income	3506	3505.29	3506	3505.5	Lower middle income	3506							6		6
66	Kenya	KEN	KEN			Sub-Saharan Africa	Lower middle income	3506	3505.84	3506	3505.72	Lower middle income	3506							6		6
70	Laos	LAO	LAO			East Asia & Pacific	Lower middle income	3506	3505.96	3506	3505.92	Lower middle income	3506							6		6
73	Lesotho	LSO	LSO	Small states		Sub-Saharan Africa	Lower middle income	3506	3505.8	3506	3505.85	Lower middle income	3506							6		6
203	Myanmar	MMR	MMR			East Asia & Pacific	Lower middle income	3506	3505.81	3506	3505.82	Lower middle income	3506							6		6
99	Nigeria	NGA	NGA			Sub-Saharan Africa	Lower middle income	3506	3505.7	3506	3505.71	Lower middle income	3506							6		6
103	Pakistan	PAK	PAK			South Asia	Lower middle income	3506	3505.75	3506	3505.74	Lower middle income	3506							6		6
248	Papua New Guinea	PNG	PNG			East Asia & Pacific	Lower middle income	3506	3505.79	3506	3505.66	Lower middle income	3506							6		6
236	Philippines	PHL	PHL			East Asia & Pacific	Lower middle income	3506	3505.91	3506	3505.93	Lower middle income	3506							6		6
141	East Timor	TLS	TLS	Small states	Island	East Asia & Pacific	Lower middle income	3506	3506	3506	3506	Lower middle income	3506							6		6
161	Vietnam	VNM	VNM			East Asia & Pacific	Lower middle income	3506	3505.74	3506	3505.77	Lower middle income	3506							6		6
154	Zambia	ZMB	ZMB			Sub-Saharan Africa	Lower middle income	3506	3505.45	3506	3505.66	Lower middle income	3506							6		6
155	Zimbabwe	ZWE	ZWE			Sub-Saharan Africa	Lower middle income	3506	3505.54	3506	3505.47	Lower middle income	3506							6		6
138	Syria	SYR	SYR			Middle East & North Africa	Low income	3504	3504.39	3504	3504.49	Low income	3504								7	7
30	Chad	TCD	TCD			Sub-Saharan Africa	Low income	3505	3505.39	3505.61	3505.49	Low income	3505								7	7
49	Gambia	GMB	GMB	Small states		Sub-Saharan Africa	Low income	3505	3505.01	3505	3505.07	Low income	3505								7	7
57	Guinea Bissau	GNB	GNB	Small states		Sub-Saharan Africa	Low income	3505	3505.39	3505.6	3505.52	Low income	3505								7	7
74	Liberia	LBR	LBR			Sub-Saharan Africa	Low income	3505	3505.46	3505.52	3505.49	Low income	3505								7	7
98	Niger	NER	NER			Sub-Saharan Africa	Low income	3505	3505.12	3505	3505.13	Low income	3505								7	7
129	Somalia	SOM	SOM			Sub-Saharan Africa	Low income	3505	3504.99	3505	3504.74	Low income	3505								7	7
140	Tajikistan	TJK	TJK			Europe & Central Asia	Low income	3505	3504.94	3505	3505.11	Low income	3505								7	7
1	Afghanistan	AFG	AFG			South Asia	Low income	3506	3505.56	3506	3505.7	Low income	3506								7	7
15	Benin	BEN	BEN			Sub-Saharan Africa	Low income	3506	3505.88	3506	3505.86	Low income	3506								7	7
24	Burkina Faso	BFA	BFA			Sub-Saharan Africa	Low income	3506	3505.68	3506	3505.73	Low income	3506								7	7
25	Burundi	BDI	BDI			Sub-Saharan Africa	Low income	3506	3506	3506	3506	Low income	3506								7	7
29	Central African Republic	CAF	CAF			Sub-Saharan Africa	Low income	3506	3505.9	3506	3505.77	Low income	3506								7	7
45	Congo, Democratic Republic of the	COD	COD			Sub-Saharan Africa	Low income	3506	3505.96	3506	3505.87	Low income	3506								7	7
188	Eritrea	ERI	ERI			Sub-Saharan Africa	Low income	3506	3505.79	3506	3505.61	Low income	3506								7	7
43	Ethiopia	ETH	ETH			Sub-Saharan Africa	Low income	3506	3505.96	3506	3505.92	Low income	3506								7	7
56	Guinea	GIN	GIN			Sub-Saharan Africa	Low income	3506	3505.73	3506	3505.71	Low income	3506								7	7
58	Haiti	HTI	HTI			Latin America & Caribbean	Low income	3506	3505.97	3506	3505.93	Low income	3506								7	7
252	North Korea	PRK	PRK			East Asia & Pacific	Low income	3506	3505.9	3506	3505.85	Low income	3506								7	7
81	Madagascar	MDG	MDG			Sub-Saharan Africa	Low income	3506	3505.91	3506	3505.89	Low income	3506								7	7
82	Malawi	MWI	MWI			Sub-Saharan Africa	Low income	3506	3505.97	3506	3505.96	Low income	3506								7	7
84	Mali	MLI	MLI			Sub-Saharan Africa	Low income	3506	3505.47	3505.45	3505.4	Low income	3506								7	7
91	Mozambique	MOZ	MOZ			Sub-Saharan Africa	Low income	3506	3505.89	3506	3505.8	Low income	3506								7	7
96	Nepal	NPL	NPL			South Asia	Low income	3506	3506	3506	3506	Low income	3506								7	7
113	Rwanda	RWA	RWA			Sub-Saharan Africa	Low income	3506	3505.99	3506	3505.99	Low income	3506								7	7
124	Sierra Leone	SLE	SLE			Sub-Saharan Africa	Low income	3506	3505.75	3505.43	3505.27	Low income	3506								7	7
208	Somaliland		SOM			Sub-Saharan Africa	Low income	3506	3505.57	3505	3505.18	Low income	3506								7	7
115	South Sudan	SSD	SSD			Sub-Saharan Africa	Low income	3506	3505.12	3506	3505.59	Low income	3506								7	7
167	Tanzania	TZA	TZA			Sub-Saharan Africa	Low income	3506	3505.8	3506	3505.77	Low income	3506								7	7
142	Togo	TGO	TGO			Sub-Saharan Africa	Low income	3506	3505.95	3506	3505.95	Low income	3506								7	7
158	Yemen	YEM	YEM			Middle East & North Africa	Low income	3506	3505.97	3506	3505.61	Low income	3506								7	7
94	Namibia	NAM	NAM	Small states		Sub-Saharan Africa	Upper middle income	3504	3504.44	3502.29	3503.12		3504	no mechanization
181	Cape Verde	CPV	CPV	Small states	Island	Sub-Saharan Africa	Lower middle income	3504	3504.52	3504.26	3504.46		3504	no mechanization
139	Sao Tome and Principe	STP	STP	Small states	Island	Sub-Saharan Africa	Lower middle income	3506	3506	3506	3506		3506	no mechanization
147	Uganda	UGA	UGA			Sub-Saharan Africa	Low income	3506	3505.96	3506	3505.95		3506	no mechanization
174	Cook Islands	COK	COK		Island			3506	3506				3506
185	Djibouti	DJI	DJI	Small states		Middle East & North Africa	Lower middle income	3506	3506	3506	3505.96		3506	no mechanization
201	Mauritania	MRT	MRT			Sub-Saharan Africa	Lower middle income	3506	3505.24	3504.58	3504.51		3506	no mechanization
256	French Guiana		X					3506	3506	3506	3506		3506	no mechanization
4	American Samoa	ASM	ASM		Island	East Asia & Pacific	Upper middle income
8	Aruba	ABW	ABW		Island	Latin America & Caribbean	High income
20	British Indian Ocean Territory	IOT	IOT		Island
21	British Virgin Islands	VGB	VGB		Island	Latin America & Caribbean	High income			3506	3506
31	Clipperton Island		X		Island
32	Comoros	COM	COM	Small states	Island	Sub-Saharan Africa	Lower middle income
34	CuraÃ§ao	CUW	CUW		Island	Latin America & Caribbean	High income
38	Dominica	DMA	DMA	Small states	Island	Latin America & Caribbean	Upper middle income			3504.28	3504.43			no mechanization
44	Faroe Islands	FRO	FRO		Island	Europe & Central Asia	High income
47	Australia, Ashmore and Cartier Islands		X		Island
53	Guam	GUM	GUM			East Asia & Pacific	High income			3506	3506			no mechanization
59	Heard Island and McDonald Islands	HMD	HMD		Island
83	Maldives	MDV	MDV	Small states	Island	South Asia	Upper middle income
86	Monaco	MCO	MCO			Europe & Central Asia	High income
89	Montserrat	MSR	MSR		Island					3506	3506			no mechanization
95	Nauru	NRU	NRU	Small states	Island	East Asia & Pacific	Upper middle income
97	Australia, Indian Ocean Territories		X		Island
100	Niue	NIU	NIU		Island					3505.5	3505.5			no mechanization
101	Norfolk Island	NFK	NFK		Island
104	Palau	PLW	PLW	Small states	Island	East Asia & Pacific	High income
108	Pitcairn Islands	PCN	PCN		Island
114	South Georgia and South Sandwich Islands	SGS	SGS		Island
116	Saint Helena	SHN	SHN		Island
118	Samoa	WSM	WSM	Small states	Island	East Asia & Pacific	Upper middle income
120	Scarborough Reef		X		Island
122	Serranilla Bank		X		Island
123	Siachen Glacier		X
126	Sint Maarten	SXM	SXM		Island	Latin America & Caribbean	High income
131	Spratly Islands		X		Island
132	Saint Barthelemy	BLM	BLM		Island
133	Saint Martin	MAF	MAF		Island	Latin America & Caribbean	High income
134	Saint Kitts and Nevis	KNA	KNA	Small states	Island	Latin America & Caribbean	High income			3506	3506			no mechanization
135	Saint Pierre and Miquelon	SPM	SPM		Island
144	Turks and Caicos Islands	TCA	TCA		Island	Latin America & Caribbean	High income
145	United States Minor Outlying Islands	UMI	UMI		Island
152	Vatican	VAT	VAT
157	Wallis and Futuna	WLF	WLF		Island					3505.35	3505.35			no mechanization
165	Micronesia, Federated States of	FSM	FSM	Small states	Island	East Asia & Pacific	Lower middle income			3506	3506			no mechanization
166	United States Virgin Islands	VIR	VIR		Island	Latin America & Caribbean	High income
172	Tuvalu	TUV	TUV	Small states	Island	East Asia & Pacific	Upper middle income
176	Anguilla	AIA	AIA		Island
177	Antigua and Barbuda	ATG	ATG	Small states	Island	Latin America & Caribbean	High income			3506	3506			no mechanization
178	Bajo Nuevo Bank (Petrel Is.)		X		Island
183	Coral Sea Islands		X		Island
190	Falkland Islands	FLK	FLK		Island
193	French Southern and Antarctic Lands	ATF	ATF		Island
198	Kiribati	KIR	KIR	Small states	Island	East Asia & Pacific	Lower middle income			3506	3506			no mechanization
206	Seychelles	SYC	SYC	Small states	Island	Sub-Saharan Africa	High income
207	Solomon Islands	SLB	SLB	Small states	Island	East Asia & Pacific	Lower middle income			3506	3505.9			no mechanization
210	Saint Vincent and the Grenadines	VCT	VCT	Small states	Island	Latin America & Caribbean	Upper middle income			3504	3504			no mechanization
217	Antarctica	ATA	ATA
226	Tonga	TON	TON	Small states	Island	East Asia & Pacific	Upper middle income			3505.43	3505.43			no mechanization
232	Greenland	GRL	GRL		Island	Europe & Central Asia	High income
255	Bonaire, Saint Eustatius and Saba		X		Island
257	Guadeloupe		X		Island					3506	3506			no mechanization
258	Martinique		X		Island					3504	3504			no mechanization
259	Mayotte		X		Island
260	RÃ©union		X		Island
470	Svalbard and Jan Mayen		X		Island
471	Bouvet Island		X		Island
472	Tokelau		X		Island
			ARB
			CSS
			CEB
			EAR
			EAS
			EAP
			TEA
			EMU
			ECS
			ECA
			TEC
			EUU
			FCS
			HPC
			HIC
			IBD
			IBT
			IDB
			IDX
			IDA
			LTE
			LCN
			LAC
			TLA
			LDC
			LMY
			LIC
			LMC
			MEA
			MNA
			TMN
			MIC
			NAC
			OED
			OSS
			PSS
			PST
			PRE
			SST
			SAS
			TSA
			SSF
			SSA
			TSS
			UMC
			WLD
